# Supplementary material for: The yeast Cyc8–Tup1 complex cooperates with Hda1p and Rpd3p histone deacetylases to robustly repress transcription of the subtelomeric FLO1 gene
Source: PubMed Central journal article supplement (PMC4316177; doi:10.1016/j.bbagrm.2014.07.022), 2014-11
Supplement: mmc3.pdf [file mmc3.pdf]

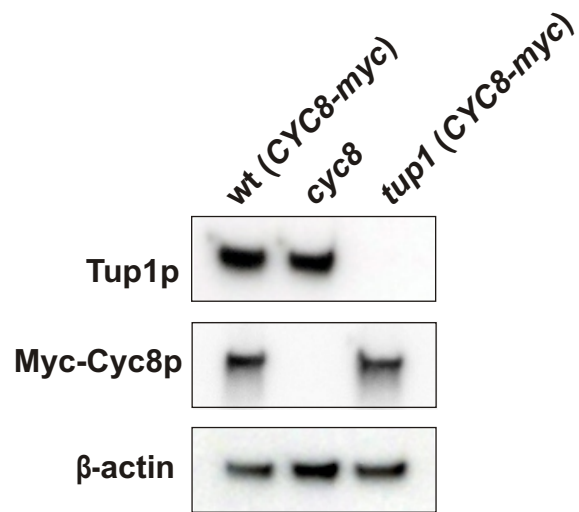

Supplemental Figure S1
